# Supplementary material for: PTK6 regulates growth and survival of endocrine therapy-resistant ER+ breast cancer cells
Source: PubMed Central journal article supplement (PMC5694002; doi:10.1038/s41523-017-0047-1), 2017-11-17

Fig.1b: MCF7 (pBabe/MF-PTK6)

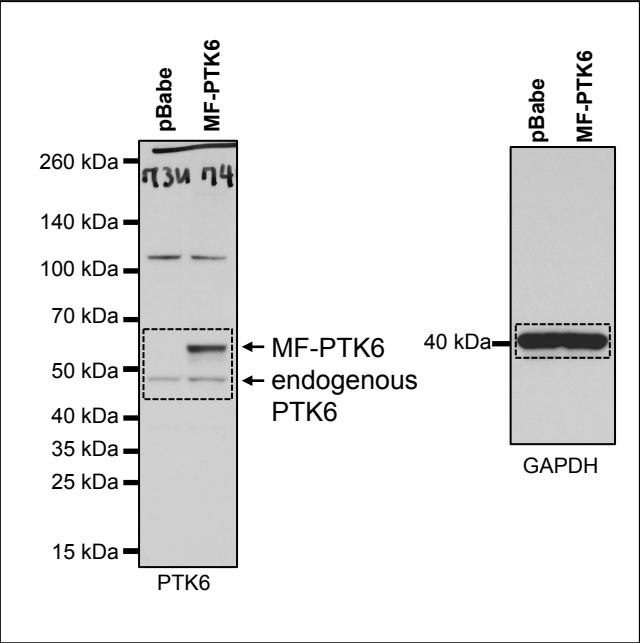

Fig.1c: T47D (pBabe/MF-PTK6)

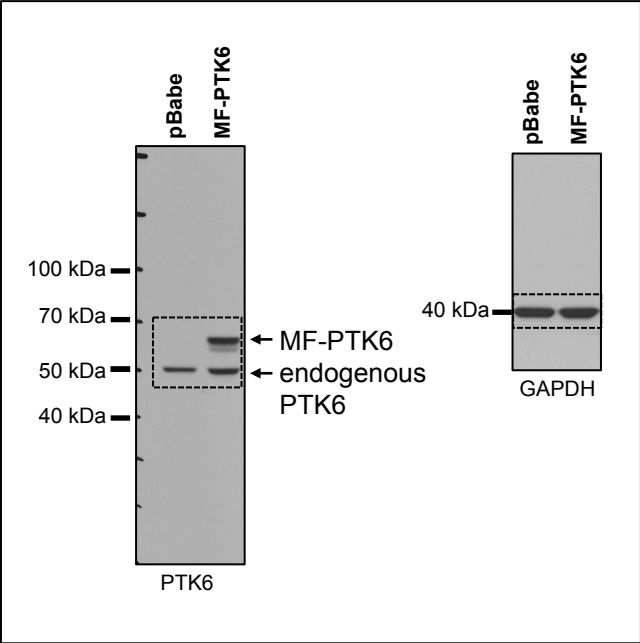

**Fig2.**

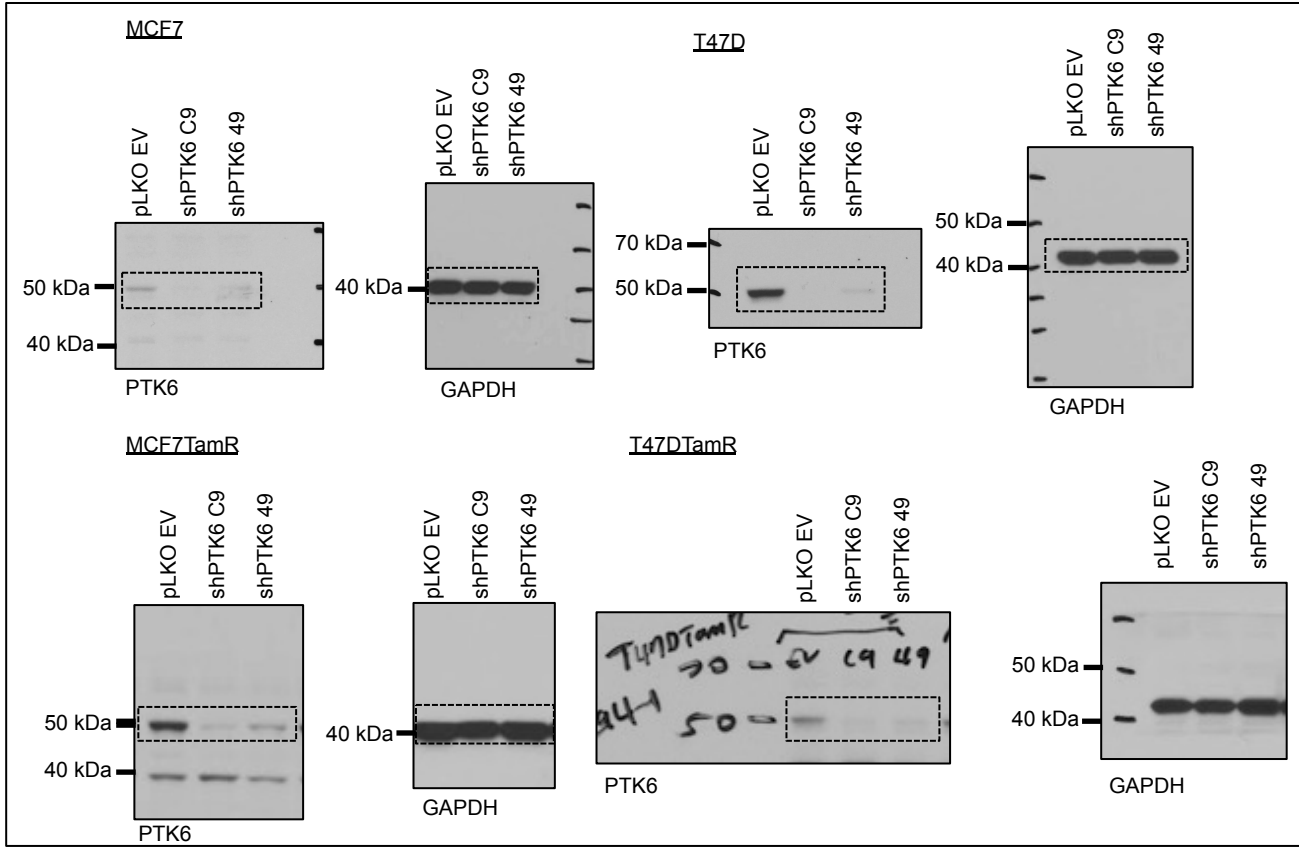

**Fig. 3a**

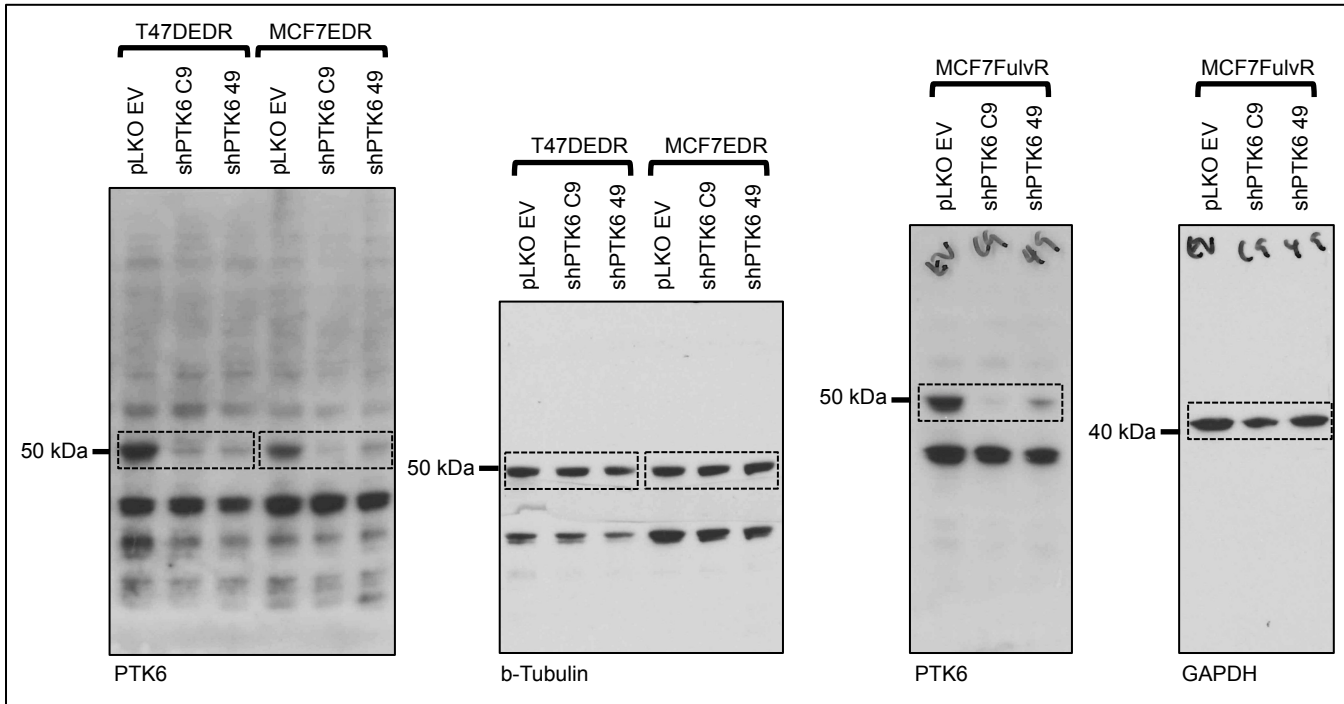

**Fig.4a.**

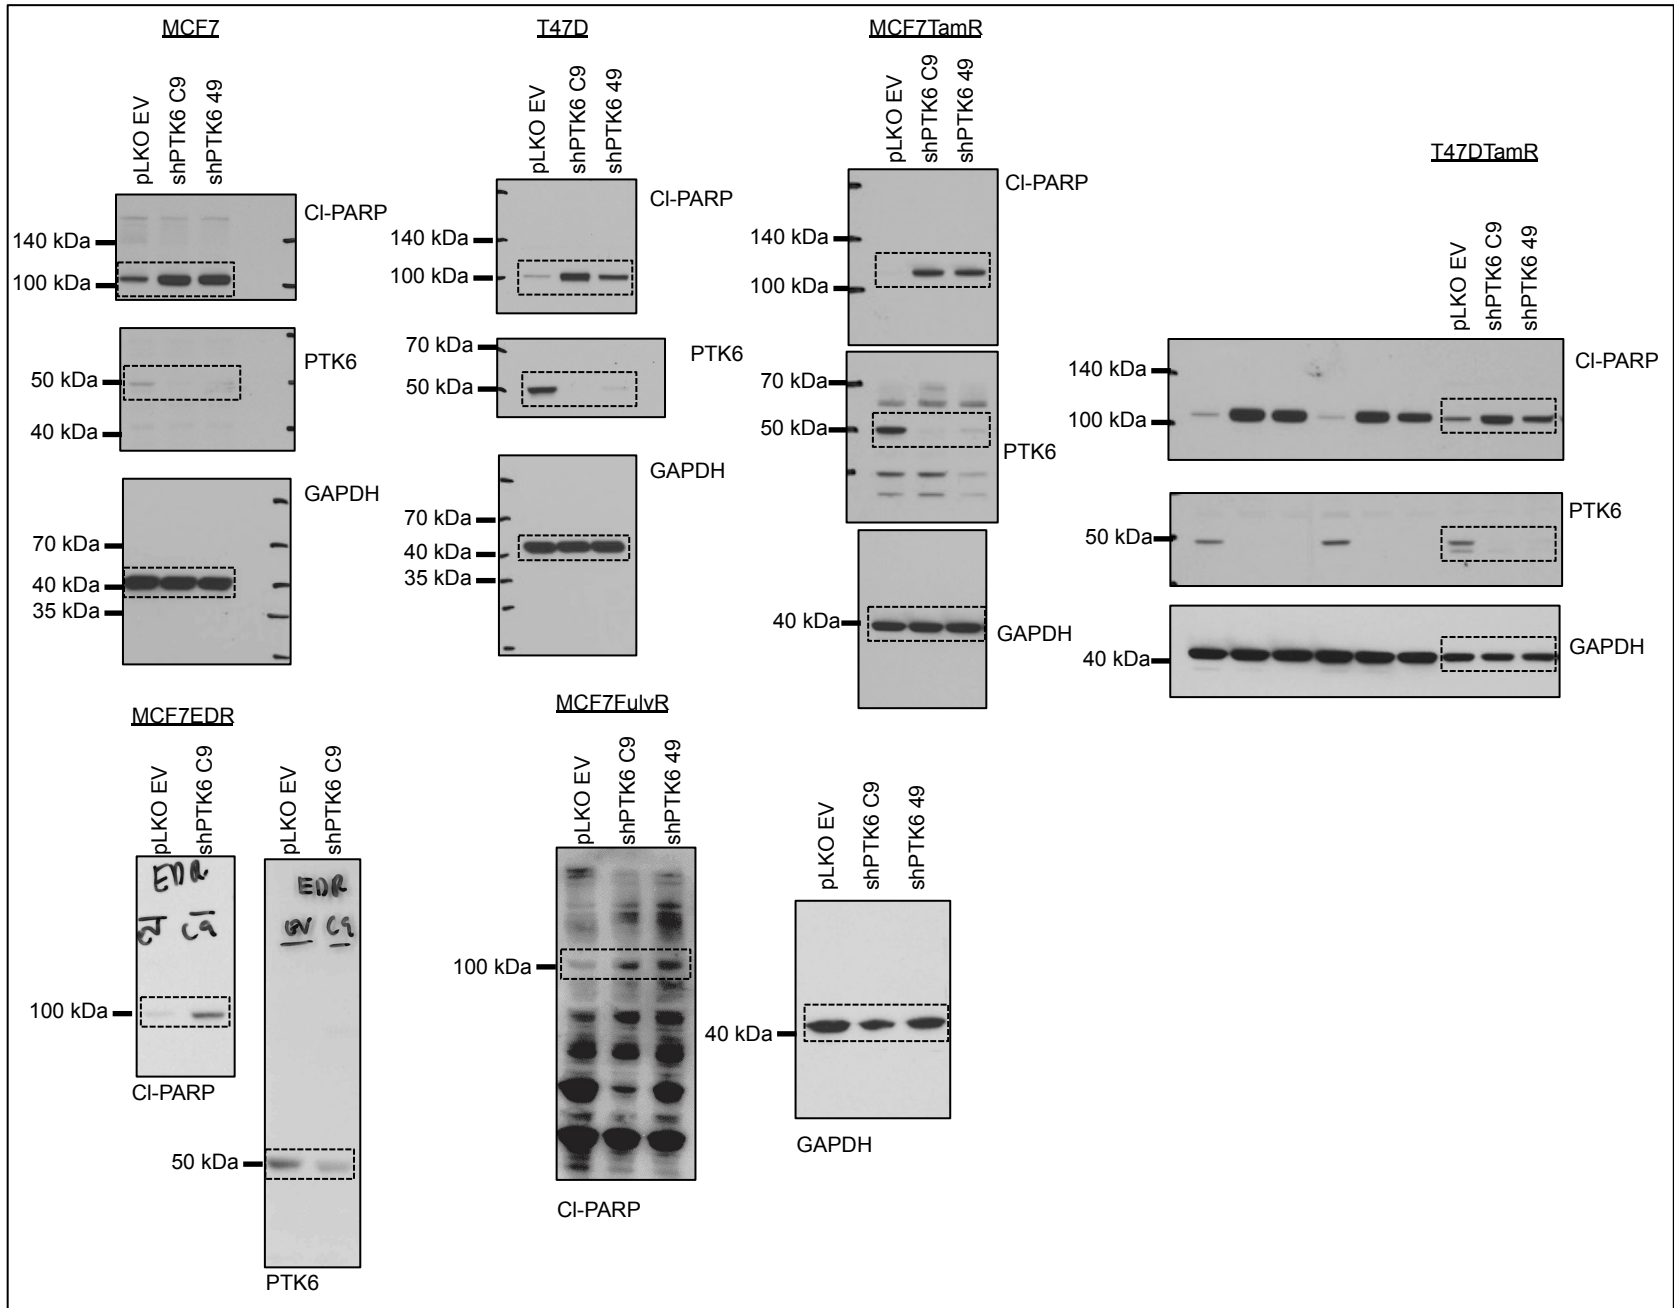

**Fig.5a**

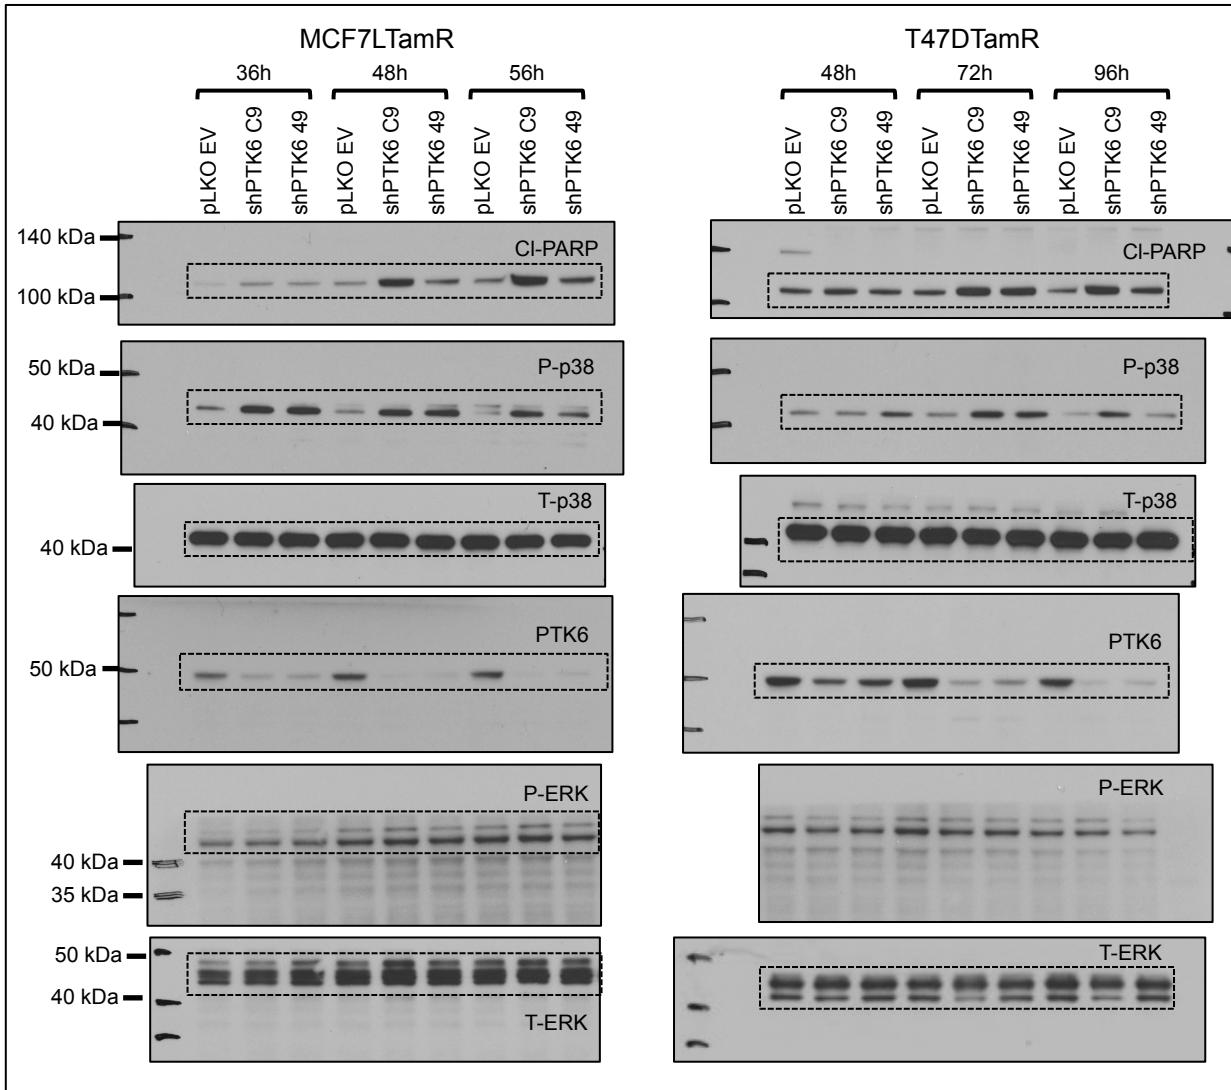

**Fig.5a**

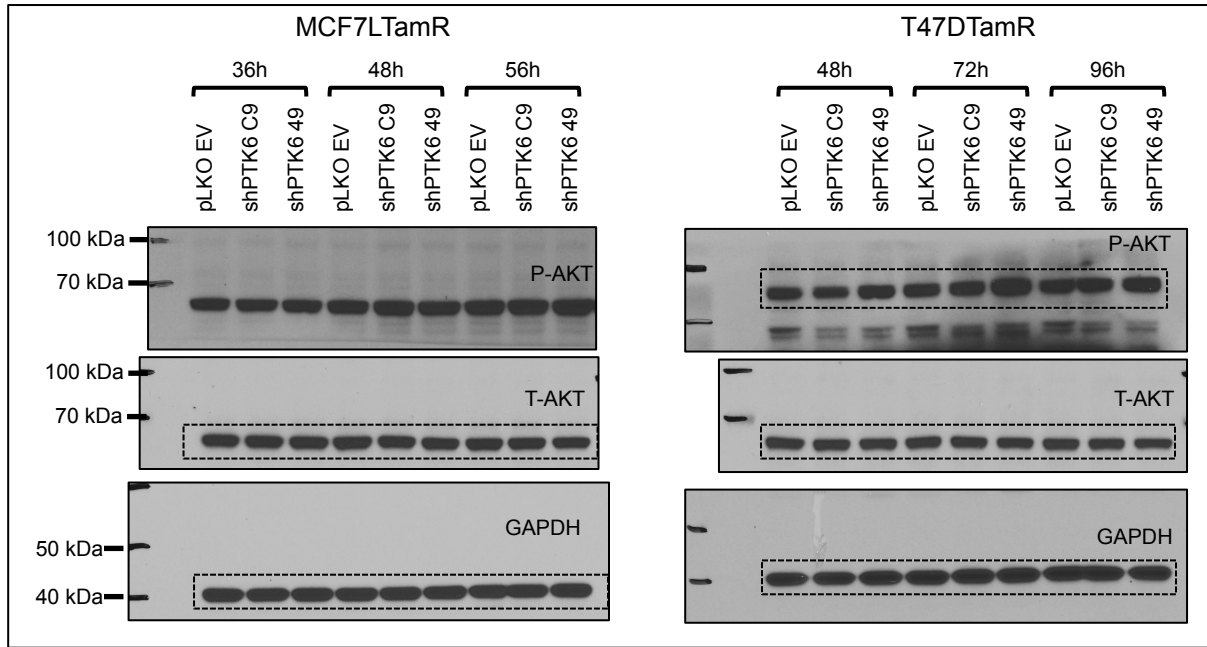

**Fig. 5b: MCF7LTamR**

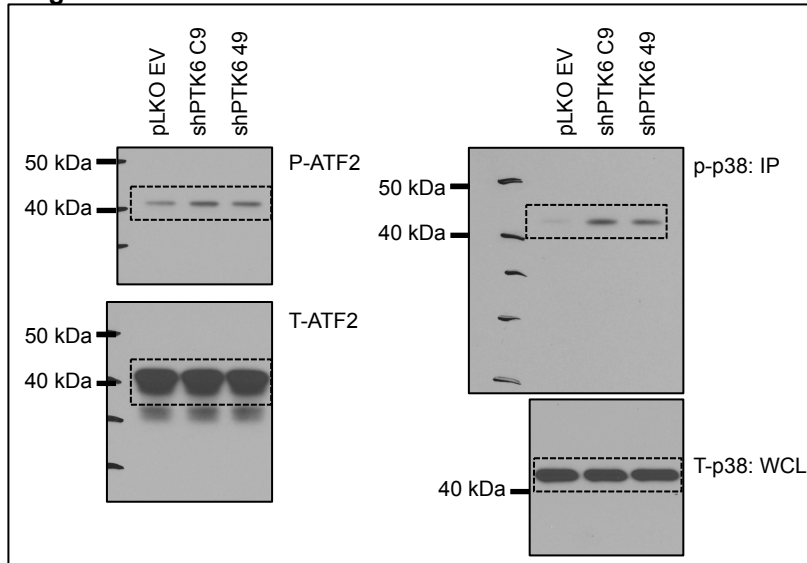

**Fig.5C: MCF7TamR**

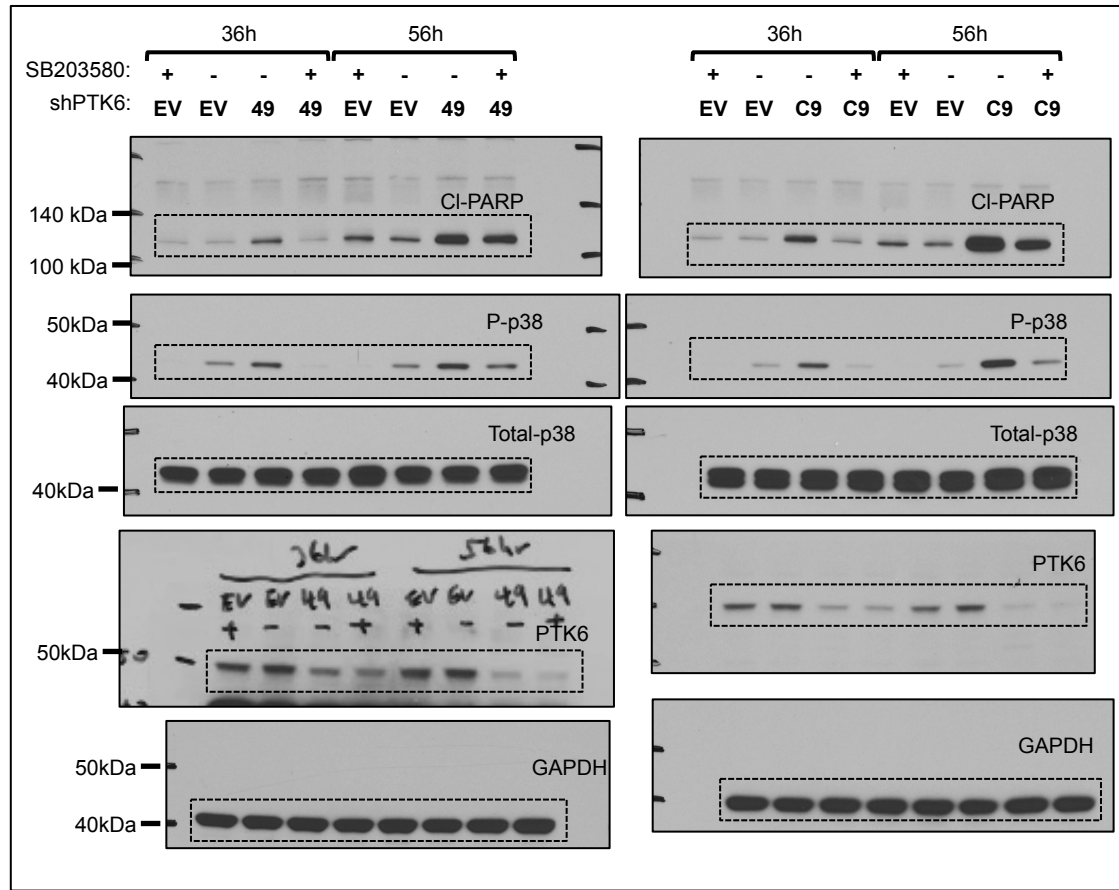

**Fig.5C: T47DTamR**

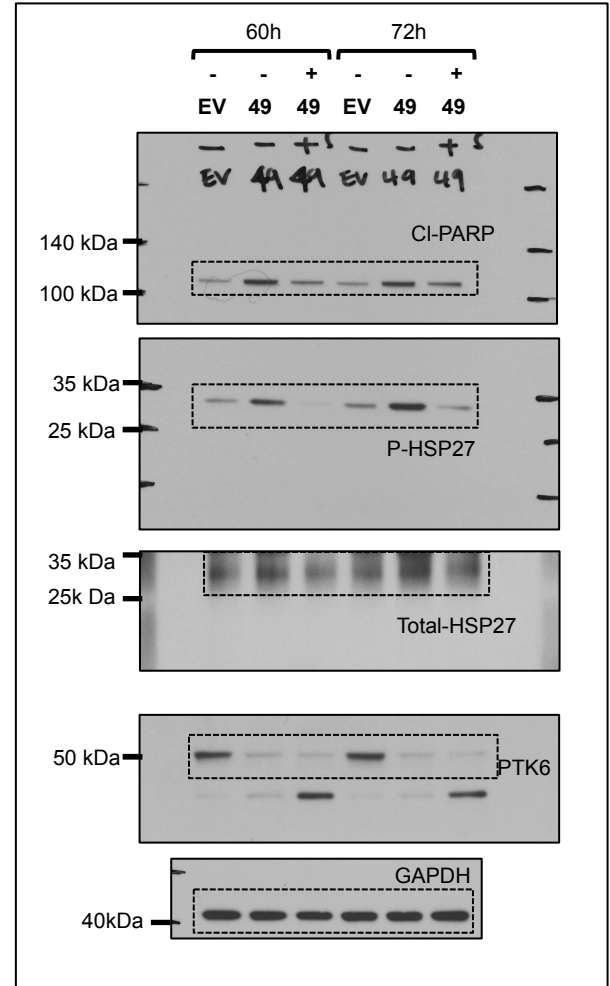

Supplement: 41523_2017_47_MOESM1_ESM.pdf [file 41523_2017_47_MOESM1_ESM.pdf]
