# Supplementary material for: PTK6 regulates growth and survival of endocrine therapy-resistant ER+ breast cancer cells
Source: PubMed Central journal article supplement (PMC5694002; doi:10.1038/s41523-017-0047-1), 2017-11-17
Supplement: 41523_2017_47_MOESM2_ESM.pdf [file 41523_2017_47_MOESM2_ESM.pdf]

## Supplemental Figure 1

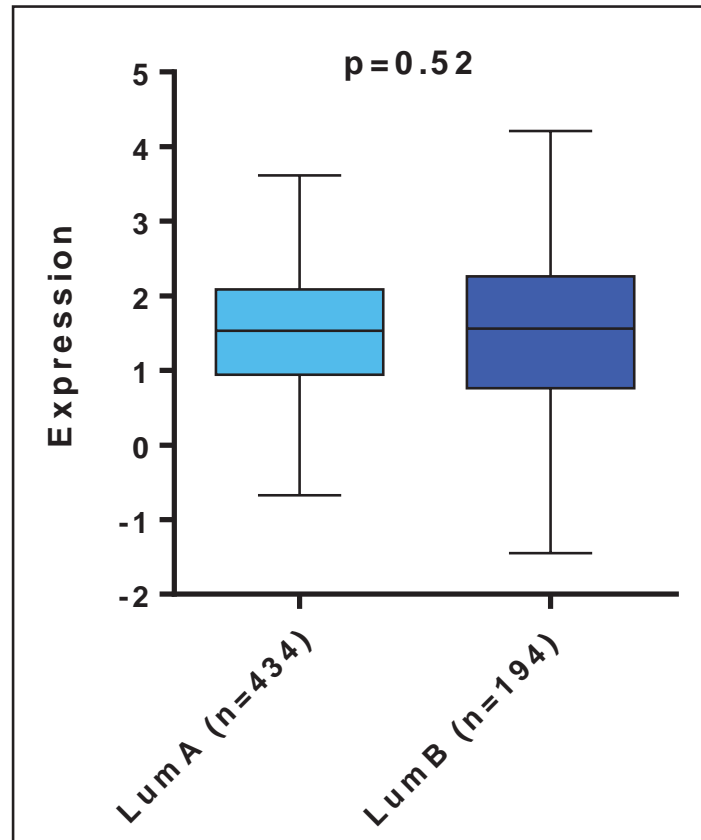

**Supplementary Figure 1A.** Boxplot showing PTK6 expression (RNA-seq, pan-cancer normalized  $\log_2(x+1)$  RSEM) in patients with Luminal A (LumA) and Luminal B (LumB) breast cancer molecular subtypes. RNA-seq data from The Cancer Genome Atlas (TCGA) were downloaded from the UCSC Xena Browser (<http://xena.ucsc.edu>).
